# Supplementary material for: InNi3C0.5@C-derived InNi3 alloy as a coke-resistant low-temperature catalyst for selective butadiene hydrogenation
Source: Royal Society of Chemistry journal article supplement (doi:10.1039/d3cy01260c), 2023-11-15
Supplement: d3cy01260c1.pdf [file d3cy01260c1.pdf]

## Electronic Supplementary Information

### **InNi<sub>3</sub>C<sub>0.5</sub>@C-derived InNi<sub>3</sub> alloy as a coke-resistant low-temperature catalyst for selective butadiene hydrogenation**

Zhibing Chen,<sup>+ a</sup> Yali Lv,<sup>+a,b</sup> Xintai Chen,<sup>a</sup> Xiaoling Mou,<sup>\*a,c</sup> Jingwei Li,<sup>\*b</sup> Li Yan,<sup>b</sup> Ronghe Lin,<sup>\*a,c</sup>  
and Yunjie Ding<sup>\*a,b,d</sup>

<sup>a</sup>Hangzhou Institute of Advanced Studies, Zhejiang Normal University, 1108 Gengwen Road, Hangzhou 116023, PR China. xiaoling.mou@zjnu.edu.cn, catalysis.lin@zjnu.edu.cn.

<sup>b</sup>Dalian National Laboratory for Clean Energy, Dalian Institute of Chemical Physics, Chinese Academy of Sciences, 457 Zhongshan Road, Dalian 116023, China. dyj@dicp.ac.cn.

<sup>c</sup>Key Laboratory of the Ministry of Education for Advanced Catalysis Materials, Zhejiang Normal University, 688 Yingbin Road, Jinhua 321004, China.

<sup>d</sup>The State Key Laboratory of Catalysis, Dalian Institute of Chemical Physics, Chinese Academy of Sciences, 457 Zhongshan Road, Dalian 116023, China.

<sup>+</sup> Equal contribution.

\*Corresponding authors. E-mails: xiaoling.mou@zjnu.edu.cn, lijw@dicp.ac.cn, catalysis.lin@zjnu.edu.cn, dyj@dicp.ac.cn.

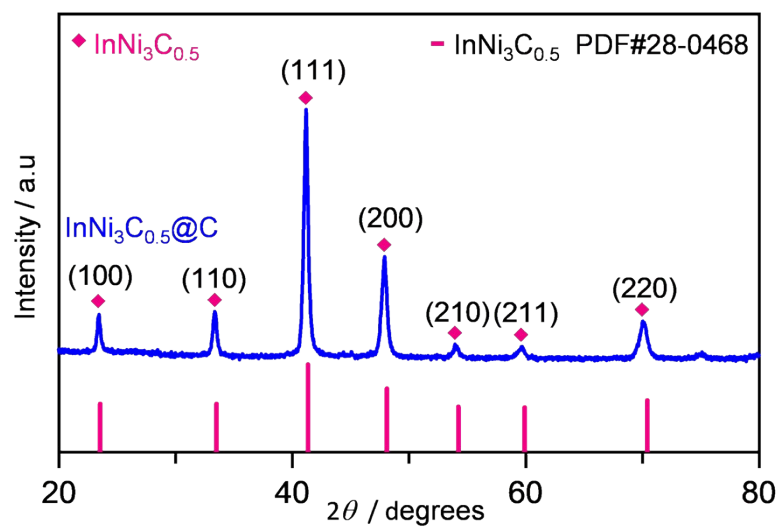

**Fig. S1.** The PXRD patterns of the as-prepared  $\text{InNi}_3\text{C}_{0.5}@C$ .

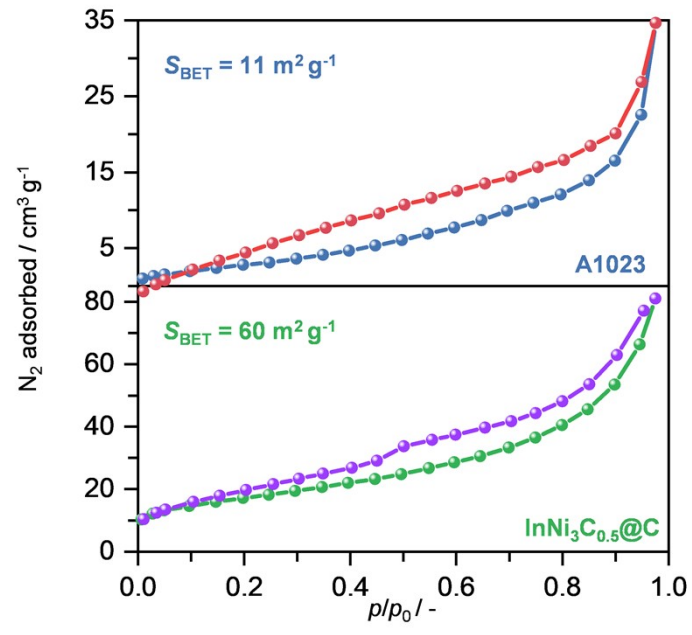

**Fig. S2.** The N<sub>2</sub> sorption isotherms of pristine InNi<sub>3</sub>C<sub>0.5</sub>@C and A1023.

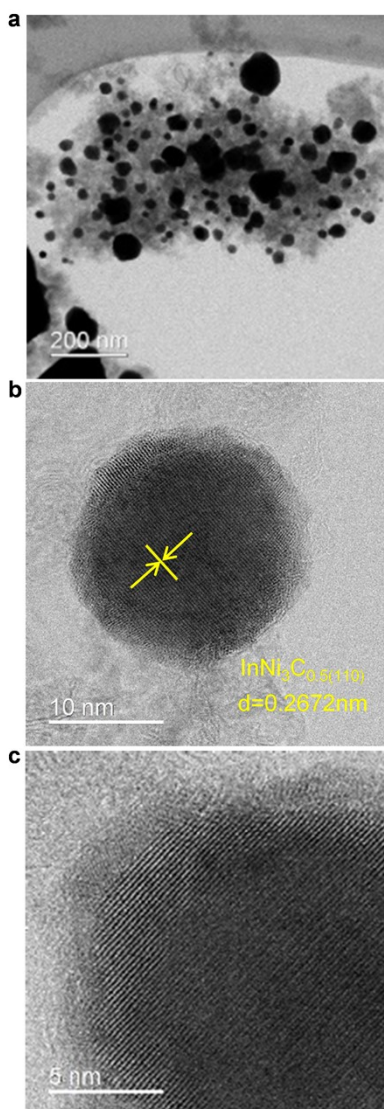

**Fig. S3.** The STEM images H1023, showing the reduced carbon shells after hydrogenation treatment at 1023 K.

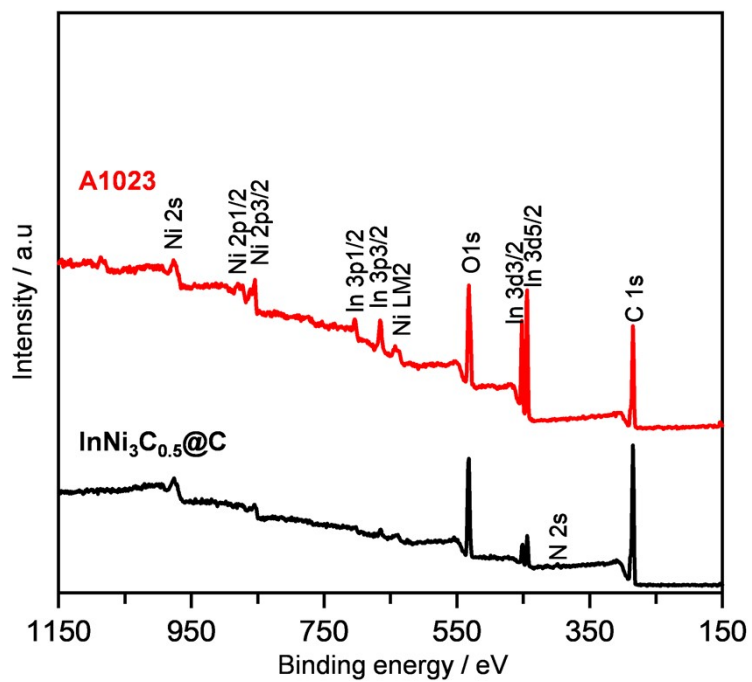

| Sample                               | Ni / at% | In / at% | O / at% | C / at% | N / at% |
|--------------------------------------|----------|----------|---------|---------|---------|
| InNi <sub>3</sub> C <sub>0.5</sub> C | 1.21     | 1.08     | 21.53   | 74.86   | 1.31    |
| A1023                                | 4.44     | 5.53     | 29.52   | 60.51   | 0       |

**Fig. S4.** The full XPS spectra of InNi<sub>3</sub>C<sub>0.5</sub>@C and A1023 (oxidized at 1023 K), accompanied with the elemental distribution.

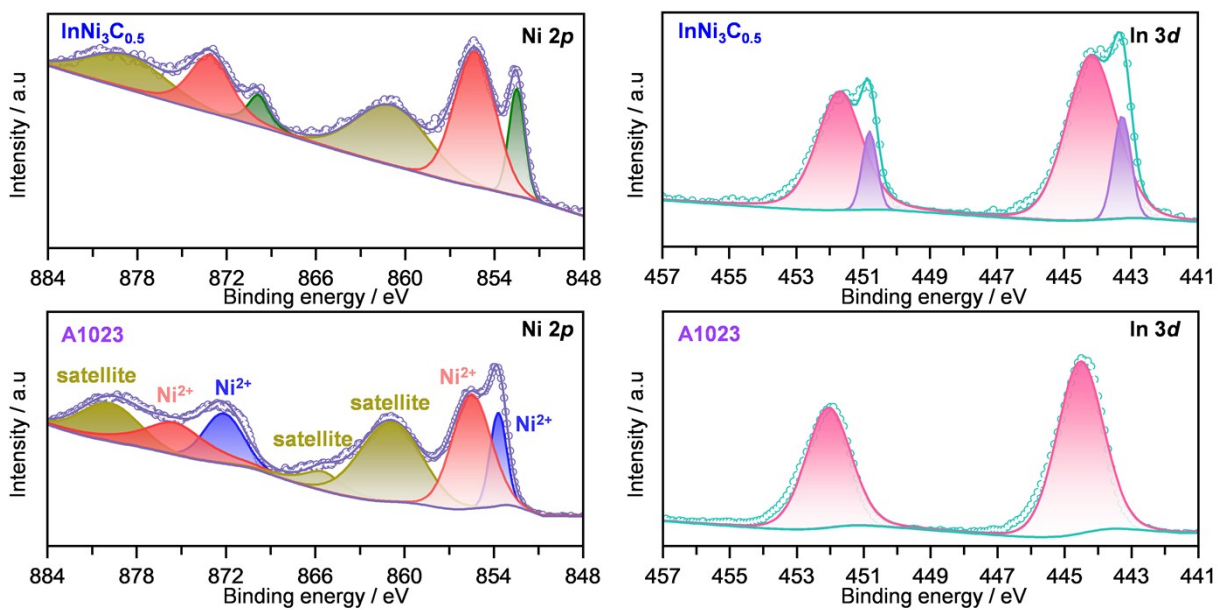

**Fig. S5.** The Ni 2p and In 3d XPS spectra of  $\text{InNi}_3\text{C}_{0.5}@\text{C}$  and A1023 (oxidized at 1023 K).

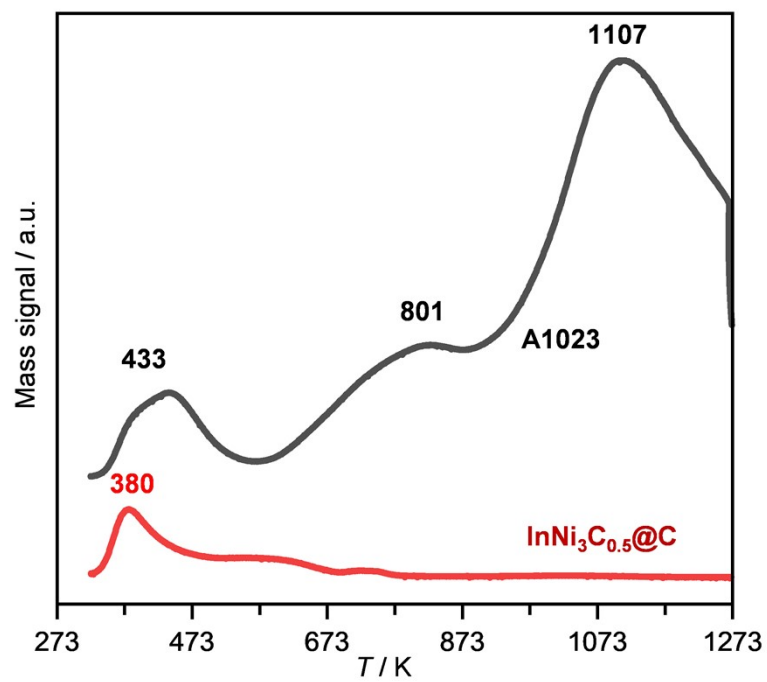

**Fig. S6.** The mass signals ( $m/z = 2$ ) during the  $H_2$ -TPD experiments on  $InNi_3C_{0.5}@C$  and A1023.

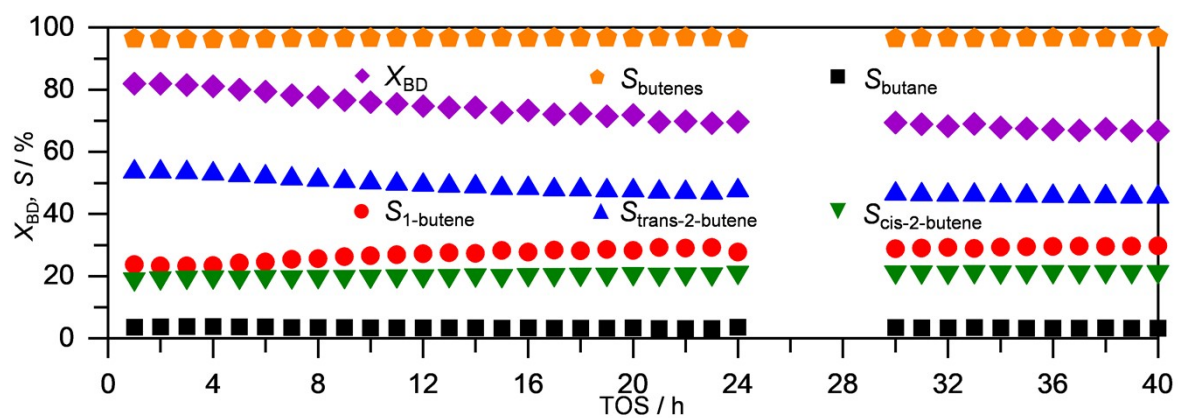

**Fig. S7.** The stability performance of A1023 in BD hydrogenation. Reaction conditions: 0.69 vol.% BD balanced in  $N_2$ ,  $H_2:BD = 50$ ,  $GHSV = 300,000 \text{ cm}^3 \text{ g}_{cat}^{-1} \text{ h}^{-1}$ ,  $T = 353 \text{ K}$ .



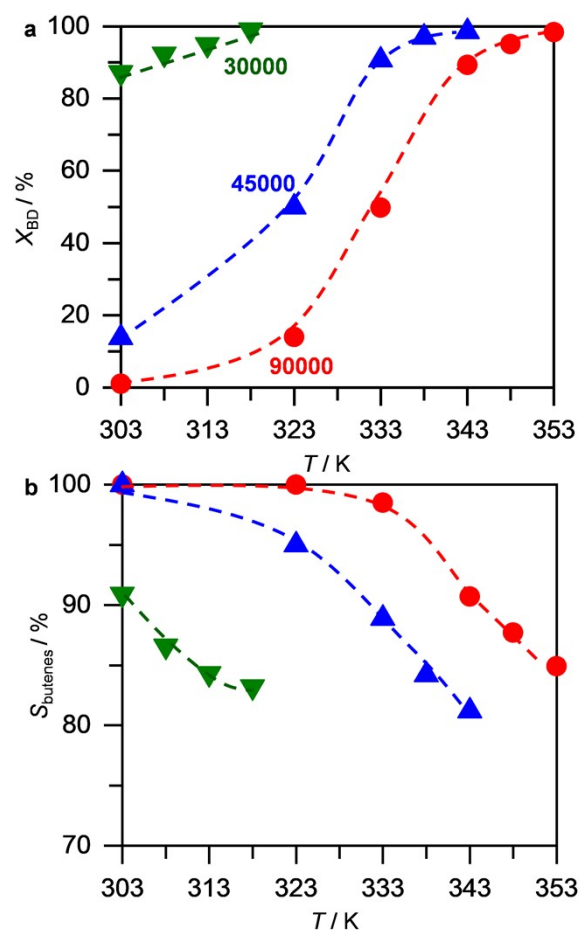

**Fig. S8.** The **a**, BD conversion and, **b**, product selectivity as a function of temperature in BD hydrogenation on A1023. Reaction conditions: 0.69 vol.% BD balanced in  $N_2$ ,  $H_2:BD = 50$ ,  $GHSV = 300,000-900,000 \text{ cm}^3 \text{ g}_{\text{cat}}^{-1} \text{ h}^{-1}$ .

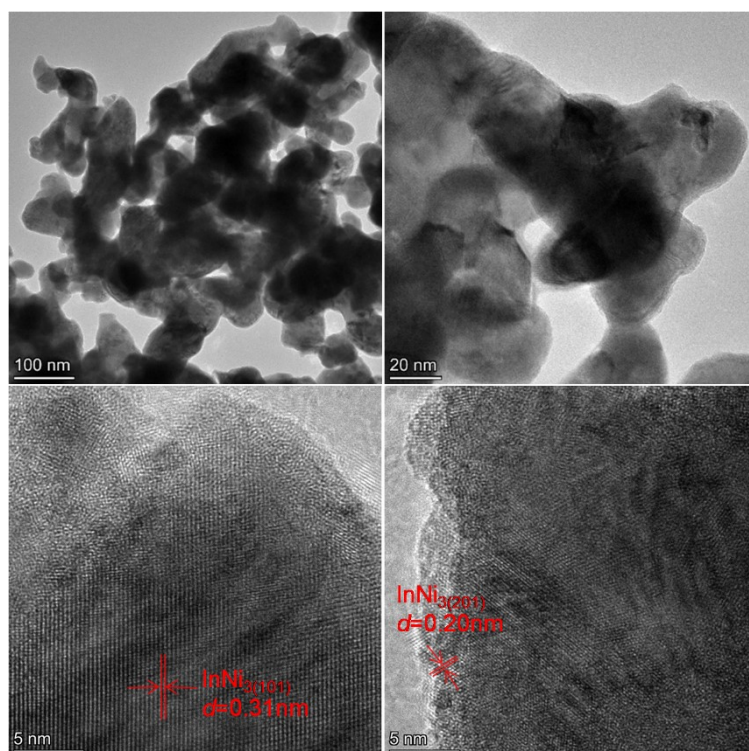

**Fig. S9.** The TEM images at different magnifications of A1023 after the 24 h evaluation in BD hydrogenation. The distinct (101) and (201) facets of InNi<sub>3</sub> alloy were evidenced from the high-resolution TEM images.

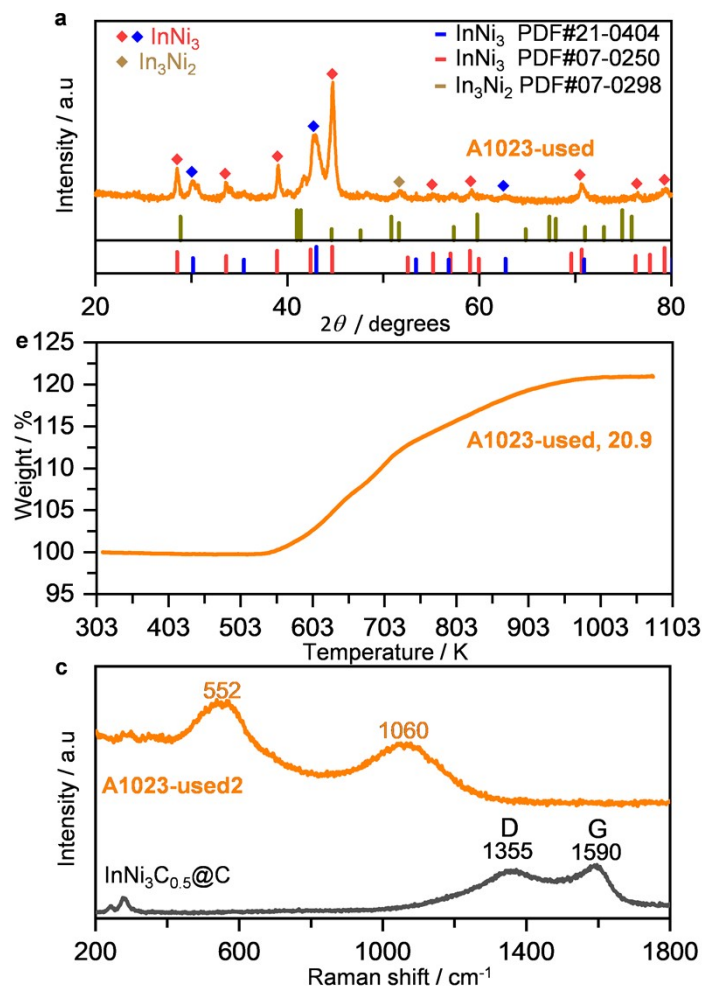

**Fig. S10.** Characterization of A1023 after the 36 h evaluation in BD hydrogenation at 318 K:  
**a**, PXRD; **b**, TGA; **c**, Raman spectra.
